# Supplementary material
Source: Springer Nature journal article supplement (https://www.springermedizin.de/resource/supplementary/13058_2009_2443_MOESM8_ESM.pdf/9701424)

A.

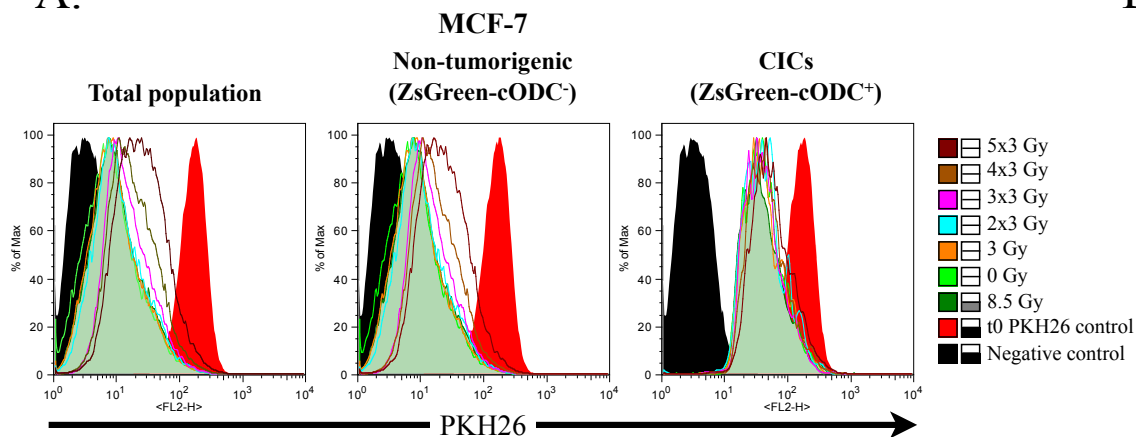

D.

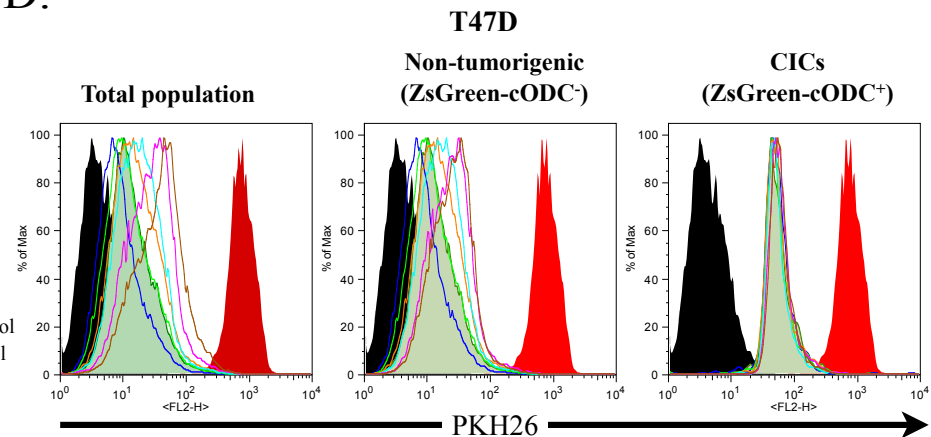

B.

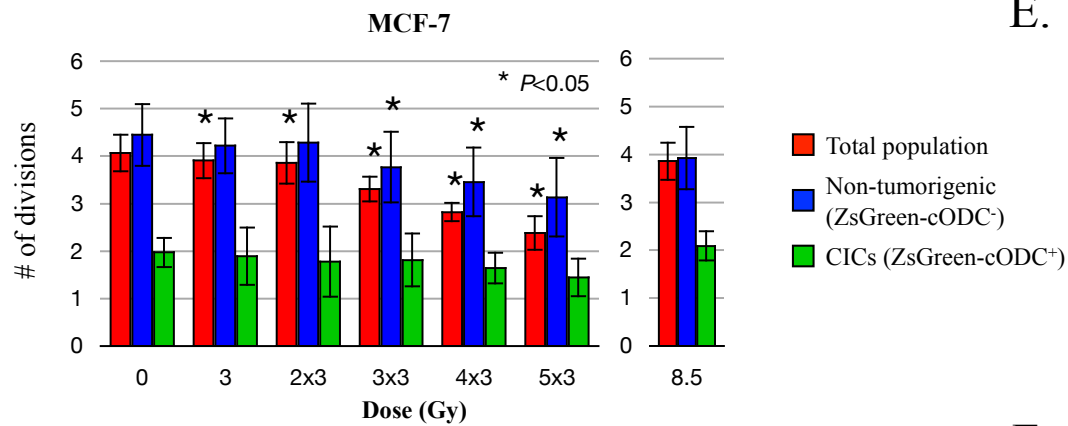

E.

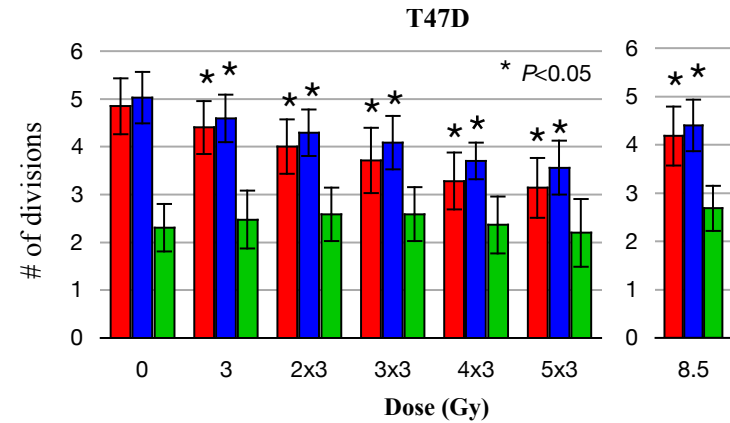

C.

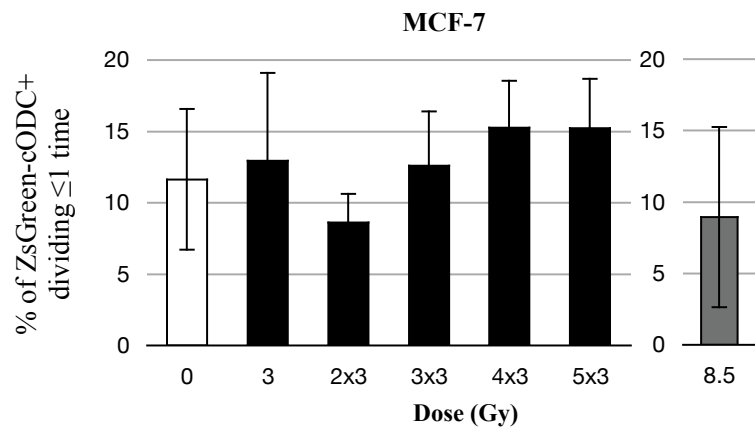

F.

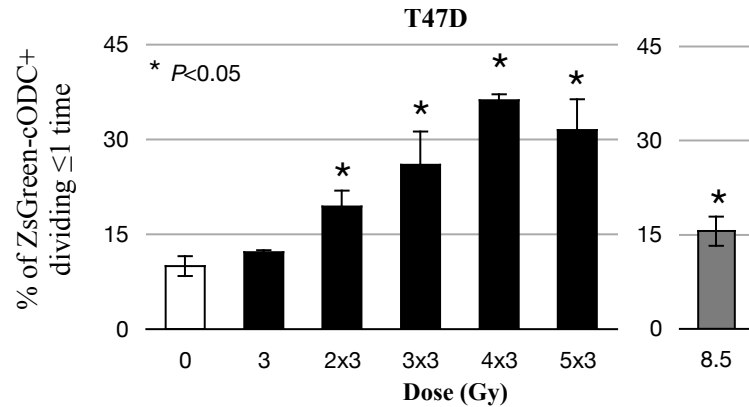

Supplement: MOESM8 [file 9701424]
